# Supplementary material for: Immune-Modulating Drug MP1032 with SARS-CoV-2 Antiviral Activity In Vitro: A potential Multi-Target Approach for Prevention and Early Intervention Treatment of COVID-19
Source: Int J Mol Sci. 2020 Nov 20;21(22):8803. doi: 10.3390/ijms21228803 (PMC7699954; doi:10.3390/ijms21228803)
Supplement: Supplementary file 1 [file ijms-21-08803-s001.pdf]

# Immune-Modulating Drug MP1032 with SARS-CoV-2 Antiviral Activity In Vitro: A potential Multi-Target Approach for Prevention and Early Intervention Treatment of COVID-19

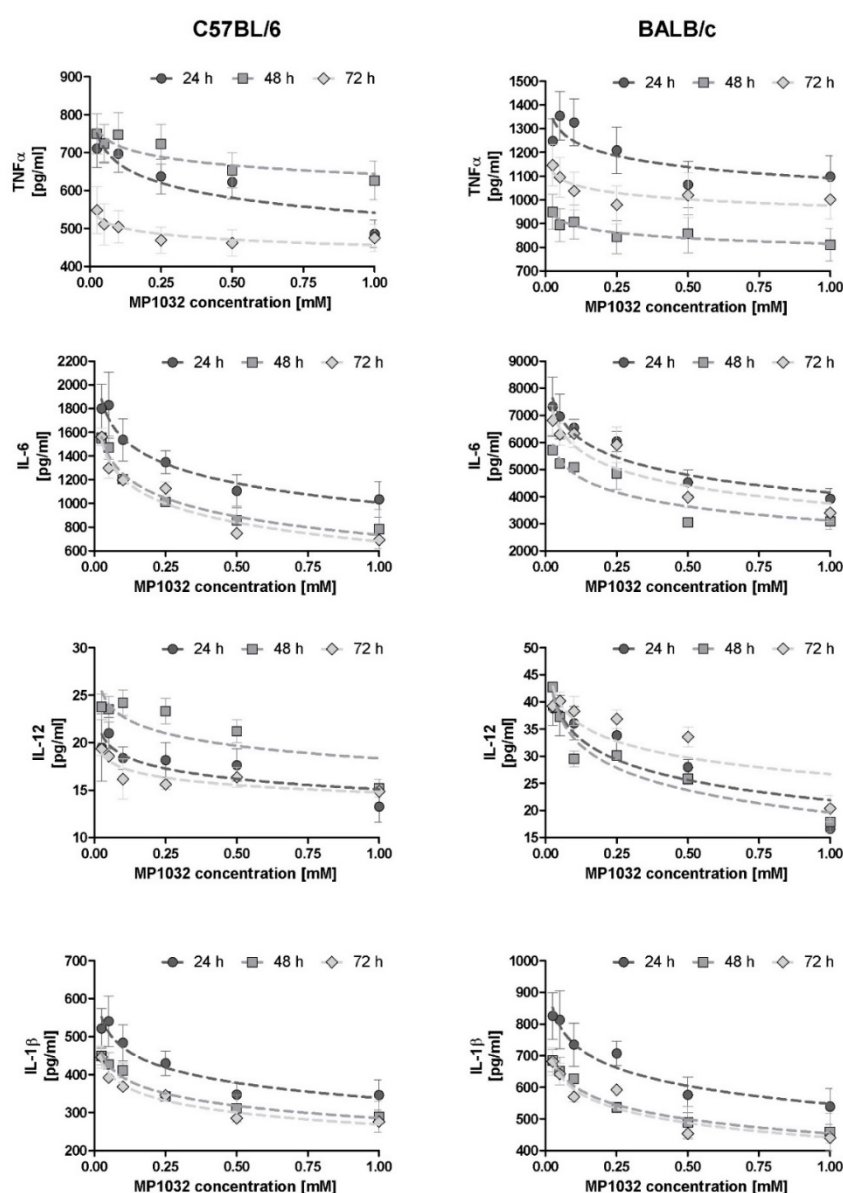

**Figure S1.** Dose-dependency of MP1032 treatment in murine peritoneal macrophages after 24, 48 or 72 h. Murine peritoneal macrophages were isolated from female C57BL/6 and BALB/c mice four days after i.p. injection of 3% thioglycolate medium. One hour prior to LPS stimulation (0.1  $\mu$ g/mL), isolated cells were pre-treated with different MP1032 concentrations (ranging from 1 mM to 0.025 mM). Cell-free supernatants were collected 24, 48, and 72 h after LPS stimulation and secreted cytokines were detected by ELISA. Data are expressed as mean  $\pm$  SEM;  $n = 2$ .

**Table S1.** Tabulated List of Adverse Drug Reactions. Frequency classifications: very common ( $\geq 1/10$ ), common ( $\geq 1/100$  to  $< 1/10$ ), uncommon ( $\geq 1/1000$  to  $< 1/100$ ), rare ( $\geq 1/10,000$  to  $< 1/1000$ ), very rare ( $< 1/10,000$ ). Coded with MedDRA version 23.0.

| System Organ Class (SOC)                             | Adverse Reaction (PT-Preferred Term) | Seriousness | Severity         | Frequency        |
|------------------------------------------------------|--------------------------------------|-------------|------------------|------------------|
| Blood and lymphatic system disorders                 | neutropenia                          | not serious | moderate         | uncommon (1/146) |
| Cardiac disorders                                    | palpitations                         | not serious | moderate         | uncommon (1/146) |
| Gastrointestinal disorders                           | abdominal pain upper                 | not serious | mild             | uncommon (1/146) |
| General disorders and administration site conditions | fatigue                              | not serious | mild             | uncommon (1/146) |
|                                                      | feeling drunk                        | not serious | mild             | uncommon (1/146) |
|                                                      | influenza-like illness               | not serious | moderate         | uncommon (1/146) |
| Infections and infestations                          | cystitis                             | not serious | moderate         | uncommon (1/146) |
|                                                      | nasopharyngitis                      | not serious | moderate         | common (2/146)   |
| Nervous system disorders                             | headache                             | not serious | mild             | uncommon (1/146) |
| Skin and subcutaneous tissue disorders               | pruritus                             | not serious | mild to moderate | common (2/146)   |
|                                                      | psoriasis                            | not serious | mild to severe   | common (2/146)   |
